# Supplementary material
Source: publisher site journal article supplement (https://www.dovepress.com/article/400903)
Supplement: Supplementary file 1 [file 08_Mar_2023_Appendix_1.pdf › 08_Mar_2023_Appendix_1.pdf]

**Appendix I:** Flow diagram of patients included in the analysis

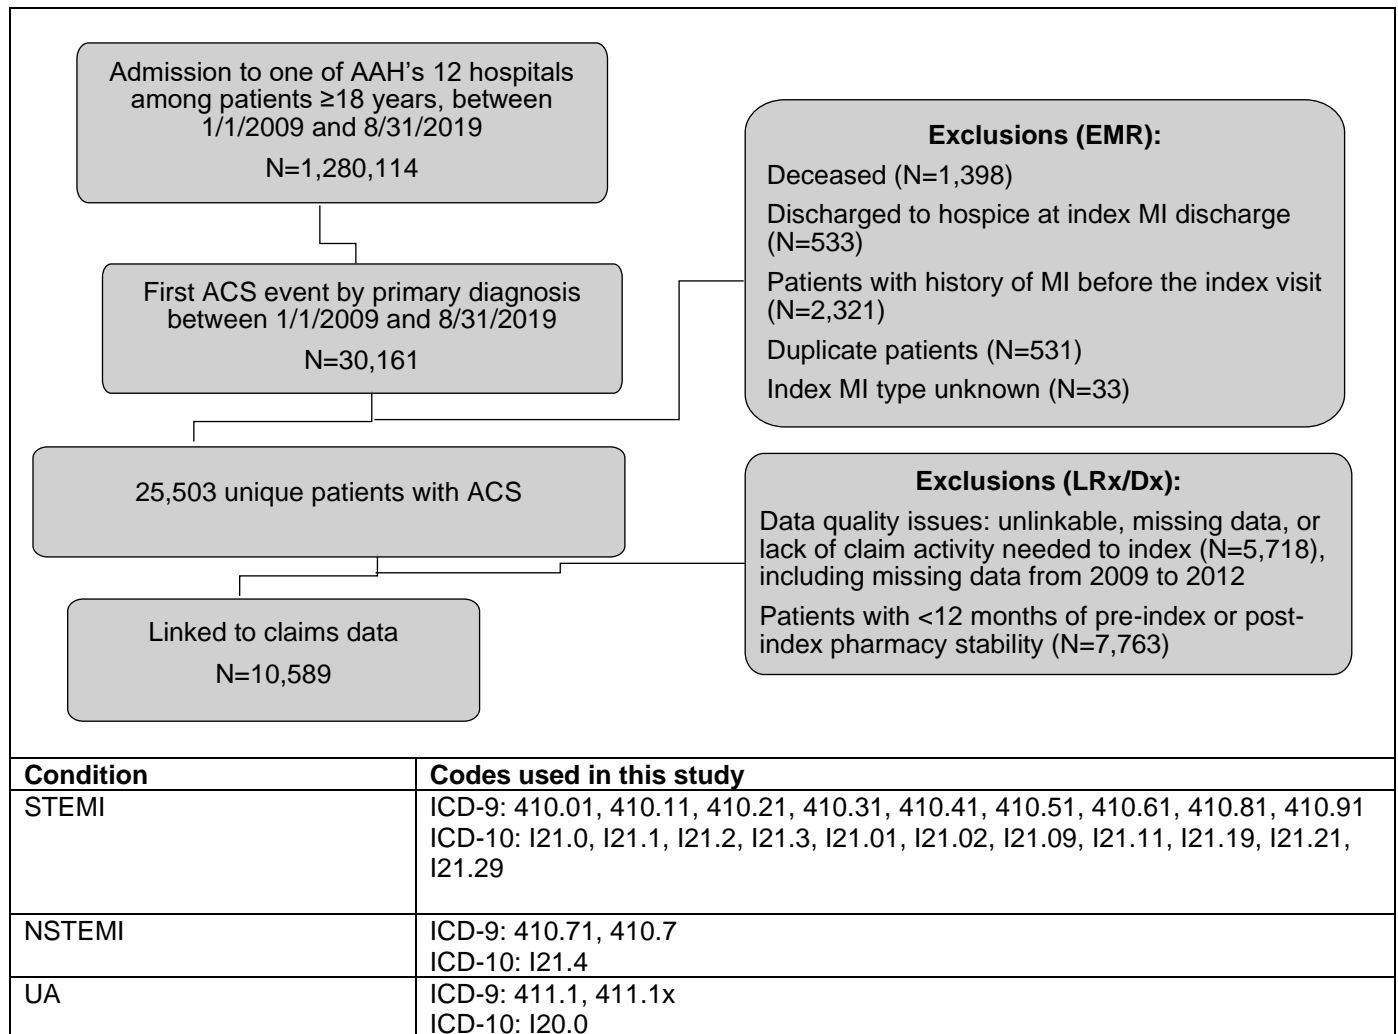

**Abbreviations:** ACS, acute coronary syndrome; AAH, Advocate Aurora Health; EHR, electronic health record; LRx/DX, IQVIA's Longitudinal Prescription Claims Data; ICD-9/ICD-10, International Classification of Diseases, Ninth Revision/Tenth Revision; MI, myocardial infarction; NSTEMI, non-ST-elevation myocardial infarction; STEMI, ST-elevation myocardial infarction; UA: unstable angina
